# Supplementary material
Source: PubMed Central journal article supplement (PMC3969104)

## **Supporting information**

### **Protein kinase CK-1 inhibitors as new potential drugs for Amyotrophic Lateral Sclerosis**

Irene G. Salado,<sup>1</sup> Miriam Redondo,<sup>1</sup> Murilo L. Bello,<sup>1,2</sup> Concepción Perez,<sup>1</sup> Nicole F. Liachko,<sup>3,4</sup> Brian C. Kraemer,<sup>3,4,5</sup> Laetitia Miguel,<sup>6,7</sup> Magalie Lecourtois,<sup>6,7</sup> Carmen Gil,<sup>1</sup> Ana Martinez,<sup>1,\*</sup> Daniel I. Perez<sup>1,\*</sup>

<sup>1</sup> Instituto de Química Médica-CSIC, Juan de la Cierva 3, 28006 Madrid, SPAIN.

<sup>2</sup> Faculdade de Farmácia, Universidade Federal do Rio de Janeiro, 21949-900, Rio de Janeiro, RJ, BRAZIL.

<sup>3</sup> Geriatric Research Education and Clinical Center, Veterans Affairs Puget Sound Health Care System, Seattle, WA 98108, USA.

<sup>4</sup> Department of Medicine, Gerontology Division, University of Washington, Seattle, WA 98104, USA.

<sup>5</sup> Department of Psychiatry and Behavioral Sciences, University of Washington, Seattle, WA 98195, USA

<sup>6</sup> Inserm, U1079, Rouen, FRANCE

<sup>7</sup> Normandie Univ (University of Rouen), IRIB Institute for Research and Innovation in Biomedicine, Rouen, FRANCE

Correspondence to:

Dr. Daniel I. Perez ([dperez@iqm.csic.es](mailto:dperez@iqm.csic.es)) or Prof Ana Martinez ([amartinez@iqm.csic.es](mailto:amartinez@iqm.csic.es));  
Tel.: +34 91562900, Fax: +34 915644852

**Table S1.-** Elemental analyses of *N*-(benzothiazolyl)-phenylacetamides and related compounds.

**Table S2.-** Kinase profiling for compound **20** (IGS-2.7). Data are expressed in % kinase activity at a concentration of 10  $\mu$ M for the tested compound.

**Table S3.-** Kinase profiling for compound **24** (IGS-2.37). Data are expressed in % kinase activity at a concentration of 10  $\mu$ M for the tested compound.

**Figure S1.-** Docked poses of selected CK-1 $\delta$  inhibitors, compounds **24** (A) and **34** (B), on their target (PDB Code: 3UYS).

**Figure S2.-** Linear correlation between experimental and reported permeability of commercial drugs using the PAMPA-BBB assay.

**Table S1.** Elemental analysis

| Compound | Molecular Formula                                                                | Calculated |      |       |       | Found |      |       |       |
|----------|----------------------------------------------------------------------------------|------------|------|-------|-------|-------|------|-------|-------|
|          |                                                                                  | %C         | %H   | %N    | %S    | %C    | %H   | %N    | %S    |
| 1        | C <sub>14</sub> H <sub>13</sub> ClN <sub>2</sub> O <sub>2</sub> S                | 54.46      | 4.24 | 9.07  | 10.38 | 54.47 | 4.21 | 9.06  | 10.29 |
| 2        | C <sub>16</sub> H <sub>14</sub> ClN <sub>3</sub> O                               | 64.11      | 4.71 | 14.02 |       | 63.70 | 4.35 | 13.51 |       |
| 3        | C <sub>16</sub> H <sub>14</sub> ClN <sub>3</sub> O                               | 64.11      | 4.71 | 14.02 |       | 64.02 | 4.80 | 13.95 |       |
| 4        | C <sub>10</sub> H <sub>8</sub> ClN <sub>3</sub> OS                               | 47.34      | 3.18 | 15.56 | 12.64 | 47.98 | 3.39 | 16.80 | 12.51 |
| 5        | C <sub>12</sub> H <sub>10</sub> ClN <sub>3</sub> O                               | 58.19      | 4.07 | 16.97 |       | 58.20 | 4.09 | 16.72 |       |
| 6        | C <sub>12</sub> H <sub>10</sub> ClN <sub>3</sub> O                               | 58.19      | 4.07 | 16.97 |       | 58.10 | 4.02 | 16.85 |       |
| 7        | C <sub>15</sub> H <sub>11</sub> ClN <sub>2</sub> O <sub>2</sub>                  | 62.84      | 3.87 | 9.77  |       | 62.78 | 3.59 | 9.64  |       |
| 8        | C <sub>16</sub> H <sub>14</sub> N <sub>2</sub> O <sub>3</sub>                    | 68.07      | 5.00 | 9.92  |       | 67.87 | 4.69 | 9.74  |       |
| 9        | C <sub>15</sub> H <sub>10</sub> ClNO <sub>2</sub> S                              | 59.31      | 3.32 | 4.61  |       | 59.56 | 3.33 | 4.36  |       |
| 10       | C <sub>16</sub> H <sub>11</sub> F <sub>3</sub> N <sub>2</sub> O <sub>2</sub> S   | 54.54      | 3.15 | 7.95  | 9.10  | 54.21 | 2.99 | 7.86  | 8.98  |
| 11       | C <sub>17</sub> H <sub>15</sub> F <sub>3</sub> N <sub>2</sub> OS                 | 57.94      | 4.29 | 7.95  | 9.10  | 57.85 | 4.12 | 7.70  | 9.05  |
| 12       | C <sub>21</sub> H <sub>16</sub> N <sub>2</sub> OS                                | 73.23      | 4.68 | 8.13  | 9.31  | 73.50 | 4.72 | 8.33  | 9.26  |
| 13       | C <sub>23</sub> H <sub>20</sub> N <sub>2</sub> O <sub>2</sub> S                  | 71.11      | 5.19 | 7.21  | 8.25  | 71.12 | 5.31 | 7.20  | 8.43  |
| 14       | C <sub>16</sub> H <sub>13</sub> ClN <sub>2</sub> OS                              | 60.66      | 4.14 | 8.84  | 10.12 | 60.62 | 4.09 | 9.01  | 9.99  |
| 15       | C <sub>22</sub> H <sub>18</sub> N <sub>2</sub> OS                                | 73.71      | 5.06 | 7.82  | 8.95  | 74.00 | 5.08 | 7.54  | 8.76  |
| 16       | C <sub>16</sub> H <sub>12</sub> F <sub>3</sub> N <sub>3</sub> O <sub>2</sub> S   | 52.31      | 3.29 | 11.44 | 8.73  | 50.27 | 4.08 | 11.54 | 8.85  |
| 17       | C <sub>16</sub> H <sub>13</sub> ClN <sub>2</sub> OS                              | 60.66      | 4.14 | 8.84  | 10.12 | 60.90 | 4.15 | 8.83  | 9.87  |
| 18       | C <sub>16</sub> H <sub>13</sub> ClN <sub>2</sub> OS                              | 60.66      | 4.14 | 8.84  | 10.12 | 60.90 | 4.31 | 8.92  | 10.12 |
| 19       | C <sub>15</sub> H <sub>10</sub> Cl <sub>2</sub> N <sub>2</sub> OS                | 53.42      | 2.99 | 8.31  | 9.51  | 53.74 | 3.10 | 8.55  | 9.41  |
| 20       | C <sub>16</sub> H <sub>10</sub> ClF <sub>3</sub> N <sub>2</sub> OS               | 51.83      | 2.72 | 7.56  | 8.64  | 51.72 | 2.83 | 7.27  | 8.56  |
| 21       | C <sub>16</sub> H <sub>13</sub> ClN <sub>2</sub> O <sub>2</sub> S                | 57.74      | 3.94 | 8.42  | 9.63  | 57.46 | 3.90 | 8.27  | 9.44  |
| 22       | C <sub>16</sub> H <sub>10</sub> ClF <sub>3</sub> N <sub>2</sub> O <sub>2</sub> S | 49.68      | 2.61 | 7.24  | 8.29  | 49.81 | 2.45 | 7.32  | 7.99  |
| 23       | C <sub>17</sub> H <sub>15</sub> ClN <sub>2</sub> O <sub>2</sub> S                | 58.87      | 4.36 | 8.08  | 9.25  | 59.02 | 4.18 | 8.13  | 8.96  |
| 24       | C <sub>16</sub> H <sub>10</sub> ClF <sub>3</sub> N <sub>2</sub> OS               | 51.83      | 2.72 | 7.56  | 8.65  | 51.68 | 2.54 | 7.50  | 8.38  |
| 25       | C <sub>16</sub> H <sub>13</sub> ClN <sub>2</sub> O <sub>2</sub> S                | 57.74      | 3.94 | 8.42  | 9.63  | 57.68 | 3.97 | 8.42  | 9.69  |
| 26       | C <sub>17</sub> H <sub>15</sub> ClN <sub>2</sub> O <sub>2</sub> S                | 58.87      | 4.36 | 8.08  | 9.25  | 58.75 | 4.31 | 8.21  | 9.16  |
| 27       | C <sub>16</sub> H <sub>10</sub> ClF <sub>3</sub> N <sub>2</sub> OS               | 51.83      | 2.72 | 7.56  | 8.65  | 52.00 | 2.71 | 7.55  | 8.49  |
| 28       | C <sub>16</sub> H <sub>13</sub> ClN <sub>2</sub> O <sub>2</sub> S                | 57.74      | 3.94 | 8.42  | 9.63  | 57.74 | 3.83 | 8.20  | 9.37  |
| 29       | C <sub>17</sub> H <sub>15</sub> ClN <sub>2</sub> O <sub>2</sub> S                | 58.87      | 4.36 | 8.08  | 9.25  | 58.69 | 4.22 | 7.94  | 9.02  |
| 30       | C <sub>16</sub> H <sub>13</sub> BrN <sub>2</sub> O <sub>2</sub> S                | 50.94      | 3.47 | 7.43  | 8.50  | 51.08 | 3.60 | 7.31  | 8.29  |
| 31       | C <sub>16</sub> H <sub>13</sub> ClN <sub>2</sub> O <sub>2</sub> S                | 57.74      | 3.94 | 8.42  | 9.63  | 57.69 | 4.02 | 8.25  | 9.48  |
| 32       | C <sub>16</sub> H <sub>13</sub> FN <sub>2</sub> O <sub>2</sub> S                 | 60.75      | 4.14 | 8.86  | 10.14 | 60.54 | 3.99 | 8.74  | 9.88  |
| 33       | C <sub>17</sub> H <sub>16</sub> N <sub>2</sub> O <sub>2</sub> S                  | 65.36      | 5.16 | 8.97  | 10.26 | 65.37 | 5.40 | 8.79  | 10.36 |

|           |                           |       |      |       |       |       |      |       |       |
|-----------|---------------------------|-------|------|-------|-------|-------|------|-------|-------|
| <b>34</b> | $C_{17}H_{13}F_3N_2O_2S$  | 55.73 | 3.58 | 7.65  | 8.75  | 56.02 | 3.61 | 7.37  | 8.75  |
| <b>35</b> | $C_{17}H_{16}N_2O_3S$     | 62.18 | 4.91 | 8.53  | 9.76  | 62.05 | 4.79 | 8.52  | 10.39 |
| <b>36</b> | $C_{17}H_{13}F_3N_2O_3S$  | 53.40 | 3.43 | 7.33  | 8.39  | 53.22 | 3.28 | 7.21  | 8.09  |
| <b>37</b> | $C_{18}H_{18}N_2O_3S$     | 63.14 | 5.30 | 8.18  | 9.36  | 63.19 | 5.25 | 8.23  | 9.35  |
| <b>38</b> | $C_{17}H_{13}F_3N_2O_2S$  | 55.73 | 3.58 | 7.65  | 8.75  | 55.80 | 3.41 | 7.66  | 9.02  |
| <b>39</b> | $C_{17}H_{16}N_2O_3S$     | 62.18 | 4.91 | 8.53  | 9.76  | 62.53 | 4.68 | 8.41  | 10.00 |
| <b>40</b> | $C_{18}H_{18}N_2O_3S$     | 63.14 | 5.30 | 8.18  | 9.36  | 63.09 | 5.32 | 8.19  | 9.64  |
| <b>41</b> | $C_{17}H_{10}F_6N_2OS$    | 50.50 | 2.49 | 6.93  | 7.93  | 50.63 | 2.71 | 7.08  | 8.16  |
| <b>42</b> | $C_{17}H_{13}F_3N_2O_2S$  | 55.73 | 3.58 | 7.65  | 8.75  | 55.48 | 3.31 | 7.44  | 8.97  |
| <b>43</b> | $C_{17}H_{16}N_2O_3S$     | 62.18 | 4.91 | 8.53  | 9.76  | 62.38 | 5.10 | 8.32  | 9.66  |
| <b>44</b> | $C_{18}H_{18}N_2O_3S$     | 63.14 | 5.30 | 8.18  | 9.36  | 62.95 | 5.43 | 8.22  | 9.61  |
| <b>45</b> | $C_{15}H_{12}N_2OS$       | 67.14 | 4.51 | 10.44 | 11.95 | 67.02 | 4.63 | 10.31 | 11.74 |
| <b>46</b> | $C_{16}H_{11}F_3N_2OS$    | 57.14 | 3.30 | 8.33  | 9.53  | 57.30 | 3.28 | 8.09  | 9.80  |
| <b>47</b> | $C_{16}H_9F_3Cl_2N_2OS$   | 47.42 | 2.24 | 6.91  | 7.91  | 47.28 | 2.30 | 7.04  | 7.38  |
| <b>48</b> | $C_{16}H_{12}Cl_2N_2O_2S$ | 52.33 | 3.29 | 7.63  | 8.73  | 52.05 | 3.09 | 7.38  | 8.53  |
| <b>49</b> | $C_{17}H_{14}Cl_2N_2O_2S$ | 53.55 | 3.70 | 7.35  | 8.41  | 53.36 | 3.68 | 7.09  | 8.41  |
| <b>50</b> | $C_{16}H_9Cl_2F_3N_2O_2S$ | 45.62 | 2.15 | 6.65  | 7.62  | 45.38 | 1.97 | 6.48  | 7.47  |
| <b>51</b> | $C_{18}H_{15}F_3N_2O_3S$  | 54.54 | 3.81 | 7.07  | 8.09  | 54.82 | 3.93 | 7.38  | 8.25  |
| <b>52</b> | $C_{19}H_{17}F_3N_2O_5S$  | 51.58 | 3.87 | 6.33  | 7.25  | 51.66 | 3.90 | 6.45  | 7.47  |
| <b>53</b> | $C_{19}H_{20}N_2O_5S$     | 58.75 | 5.19 | 7.21  | 8.25  | 58.95 | 5.33 | 7.38  | 8.40  |
| <b>54</b> | $C_{20}H_{22}N_2O_5S$     | 59.69 | 5.51 | 6.96  | 7.97  | 59.46 | 5.48 | 7.05  | 8.00  |
| <b>55</b> | $C_{19}H_{17}F_3N_2O_4S$  | 53.52 | 4.02 | 6.57  | 7.52  | 53.60 | 4.04 | 6.62  | 7.71  |
| <b>56</b> | $C_{16}H_{17}F_3N_2OS$    | 56.13 | 5.00 | 8.18  | 9.37  | 56.01 | 4.97 | 8.30  | 9.19  |
| <b>57</b> | $C_{14}H_{15}F_3N_2OS$    | 53.15 | 4.78 | 8.86  | 10.14 | 53.36 | 4.91 | 9.02  | 9.90  |

**Table S2.-** Kinase profiling for compound **20** (IGS-2.7). Data are expressed in % kinase activity at a concentration of 10  $\mu$ M for the tested compound.

| Target                        | IGS-2.7         | Target              | IGS-2.7         | Target                    | IGS-2.7         |
|-------------------------------|-----------------|---------------------|-----------------|---------------------------|-----------------|
| Gene Symbol                   | %Ctrl @ 10000nM | Gene Symbol         | %Ctrl @ 10000nM | Gene Symbol               | %Ctrl @ 10000nM |
| AAK1                          | 79              | BRK                 | 100             | CSNK2A1                   | 100             |
| ABL1(E255K)-phosphorylated    | 80              | BRSK1               | 100             | CSNK2A2                   | 88              |
| ABL1(F317I)-nonphosphorylated | 82              | BRSK2               | 84              | CTK                       | 100             |
| ABL1(F317I)-phosphorylated    | 56              | BTK                 | 57              | DAPK1                     | 100             |
| ABL1(F317L)-nonphosphorylated | 100             | BUB1                | 100             | DAPK2                     | 82              |
| ABL1(F317L)-phosphorylated    | 67              | CAMK1               | 100             | DAPK3                     | 100             |
| ABL1(H396P)-nonphosphorylated | 75              | CAMK1D              | 100             | DCAMKL1                   | 48              |
| ABL1(H396P)-phosphorylated    | 80              | CAMK1G              | 100             | DCAMKL2                   | 100             |
| ABL1(M351T)-phosphorylated    | 100             | CAMK2A              | 85              | DCAMKL3                   | 100             |
| ABL1(Q252H)-nonphosphorylated | 91              | CAMK2B              | 100             | DDR1                      | 100             |
| ABL1(Q252H)-phosphorylated    | 83              | CAMK2D              | 74              | DDR2                      | 100             |
| ABL1(T315I)-nonphosphorylated | 58              | CAMK2G              | 97              | DLK                       | 92              |
| ABL1(T315I)-phosphorylated    | 75              | CAMK4               | 100             | DMPK                      | 85              |
| ABL1(Y253F)-phosphorylated    | 73              | CAMKK1              | 97              | DMPK2                     | 100             |
| ABL1-nonphosphorylated        | 73              | CAMKK2              | 74              | DRAK1                     | 100             |
| ABL1-phosphorylated           | 76              | CASK                | 60              | DRAK2                     | 87              |
| ABL2                          | 100             | CDC2L1              | 100             | DYRK1A                    | 22              |
| ACVR1                         | 72              | CDC2L2              | 100             | DYRK1B                    | 11              |
| ACVR1B                        | 72              | CDC2L5              | 88              | DYRK2                     | 46              |
| ACVR2A                        | 100             | CDK11               | 100             | EGFR                      | 49              |
| ACVR2B                        | 75              | CDK2                | 100             | EGFR(E746-A750del)        | 100             |
| ACVRL1                        | 100             | CDK3                | 100             | EGFR(G719C)               | 100             |
| ADCK3                         | 76              | CDK4-cyclinD1       | 91              | EGFR(G719S)               | 87              |
| ADCK4                         | 78              | CDK4-cyclinD3       | 65              | EGFR(L747-E749del, A750P) | 72              |
| AKT1                          | 100             | CDK5                | 89              | EGFR(L747-S752del, P753S) | 91              |
| AKT2                          | 100             | CDK7                | 55              | EGFR(L747-T751del,Sins)   | 100             |
| AKT3                          | 71              | CDK8                | 100             | EGFR(L858R)               | 95              |
| ALK                           | 100             | CDK9                | 93              | EGFR(L858R,T790M)         | 88              |
| ALK(C1156Y)                   | 100             | CDKL1               | 54              | EGFR(L861Q)               | 100             |
| ALK(L1196M)                   | 100             | CDKL2               | 100             | EGFR(S752-I759del)        | 100             |
| AMPK-alpha1                   | 97              | CDKL3               | 80              | EGFR(T790M)               | 36              |
| AMPK-alpha2                   | 100             | CDKL5               | 100             | EIF2AK1                   | 37              |
| ANKK1                         | 56              | CHEK1               | 100             | EPHA1                     | 100             |
| ARK5                          | 81              | CHEK2               | 97              | EPHA2                     | 91              |
| ASK1                          | 100             | CIT                 | 81              | EPHA3                     | 90              |
| ASK2                          | 85              | CLK1                | 9.9             | EPHA4                     | 85              |
| AURKA                         | 84              | CLK2                | 76              | EPHA5                     | 82              |
| AURKB                         | 55              | CLK3                | 50              | EPHA6                     | 93              |
| AURKC                         | 95              | CLK4                | 11              | EPHA7                     | 100             |
| AXL                           | 95              | CSF1R               | 56              | EPHA8                     | 100             |
| BIKE                          | 76              | CSF1R-autoinhibited | 100             | EPHB1                     | 100             |
| BLK                           | 100             | CSK                 | 100             | EPHB2                     | 100             |
| BMPR1A                        | 100             | CSNK1A1             | 16              | EPHB3                     | 96              |
| BMPR1B                        | 100             | CSNK1A1L            | 12              | EPHB4                     | 98              |
| BMPR2                         | 66              | CSNK1D              | 1.7             | EPHB6                     | 75              |
| BMX                           | 100             | CSNK1E              | 0.1             | ERBB2                     | 100             |
| BRAF                          | 79              | CSNK1G1             | 84              | ERBB3                     | 89              |
| BRAF(V600E)                   | 91              | CSNK1G2             | 32              | ERBB4                     | 100             |
|                               |                 | CSNK1G3             | 51              | ERK1                      | 100             |

| Target                | IGS-2.7        | Target                       | IGS-2.7        | Target      | IGS-2.7        |
|-----------------------|----------------|------------------------------|----------------|-------------|----------------|
| Gene Symbol           | %Ctrl @ 1000nM | Gene Symbol                  | %Ctrl @ 1000nM | Gene Symbol | %Ctrl @ 1000nM |
| ERK2                  | 90             | IRAK1                        | 94             | MEK1        | 100            |
| ERK3                  | 98             | IRAK3                        | 59             | MEK2        | 100            |
| ERK4                  | 100            | IRAK4                        | 64             | MEK3        | 100            |
| ERK5                  | 83             | ITK                          | 98             | MEK4        | 99             |
| ERK8                  | 77             | JAK1(JH1domain-catalytic)    | 100            | MEK5        | 99             |
| ERN1                  | 97             | JAK1(JH2domain-pseudokinase) | 100            | MEK6        | 72             |
| FAK                   | 81             | JAK2(JH1domain-catalytic)    | 38             | MELK        | 100            |
| FER                   | 84             | JAK3(JH1domain-catalytic)    | 74             | MERTK       | 68             |
| FES                   | 80             | JNK1                         | 70             | MET         | 100            |
| FGFR1                 | 92             | JNK2                         | 57             | MET(M1250T) | 79             |
| FGFR2                 | 81             | JNK3                         | 59             | MET(Y1235D) | 80             |
| FGFR3                 | 78             | KIT                          | 19             | MINK        | 33             |
| FGFR3(G697C)          | 100            | KIT(A829P)                   | 87             | MKK7        | 99             |
| FGFR4                 | 95             | KIT(D816H)                   | 91             | MKNK1       | 61             |
| FGR                   | 80             | KIT(D816V)                   | 65             | MKNK2       | 81             |
| FLT1                  | 28             | KIT(L576P)                   | 20             | MLCK        | 5              |
| FLT3                  | 50             | KIT(V559D)                   | 14             | MLK1        | 94             |
| FLT3(D835H)           | 72             | KIT(V559D,T670I)             | 29             | MLK2        | 100            |
| FLT3(D835Y)           | 72             | KIT(V559D,V654A)             | 46             | MLK3        | 86             |
| FLT3(ITD)             | 59             | KIT-autoinhibited            | 100            | MRCCKA      | 100            |
| FLT3(K663Q)           | 39             | LATS1                        | 64             | MRCCKB      | 100            |
| FLT3(N841I)           | 67             | LATS2                        | 100            | MST1        | 100            |
| FLT3(R834Q)           | 93             | LCK                          | 86             | MST1R       | 100            |
| FLT3-autoinhibited    | 100            | LIMK1                        | 82             | MST2        | 100            |
| FLT4                  | 92             | LIMK2                        | 100            | MST3        | 100            |
| FRK                   | 100            | LKB1                         | 100            | MST4        | 100            |
| FYN                   | 100            | LOK                          | 100            | MTOR        | 88             |
| GAK                   | 100            | LRRK2                        | 94             | MUSK        | 100            |
| GCN2(Kin.Dom.2,S808G) | 100            | LRRK2(G2019S)                | 93             | MYLK        | 81             |
| GRK1                  | 89             | LTK                          | 100            | MYLK2       | 60             |
| GRK4                  | 100            | LYN                          | 100            | MYLK4       | 74             |
| GRK7                  | 63             | LZK                          | 86             | MYO3A       | 100            |
| GSK3A                 | 72             | MAK                          | 100            | MYO3B       | 57             |
| GSK3B                 | 92             | MAP3K1                       | 62             | NDR1        | 62             |
| HASPIN                | 82             | MAP3K15                      | 100            | NDR2        | 81             |
| HCK                   | 77             | MAP3K2                       | 91             | NEK1        | 88             |
| HIPK1                 | 84             | MAP3K3                       | 99             | NEK10       | 100            |
| HIPK2                 | 33             | MAP3K4                       | 100            | NEK11       | 91             |
| HIPK3                 | 92             | MAP4K2                       | 100            | NEK2        | 100            |
| HIPK4                 | 77             | MAP4K3                       | 100            | NEK3        | 68             |
| HPK1                  | 100            | MAP4K4                       | 100            | NEK4        | 100            |
| HUNK                  | 77             | MAP4K5                       | 92             | NEK5        | 100            |
| ICK                   | 77             | MAPKAPK2                     | 100            | NEK6        | 82             |
| IGF1R                 | 100            | MAPKAPK5                     | 85             | NEK7        | 100            |
| IKK-alpha             | 36             | MARK1                        | 73             | NEK9        | 100            |
| IKK-beta              | 48             | MARK2                        | 100            | NIK         | 97             |
| IKK-epsilon           | 100            | MARK3                        | 100            | NIM1        | 100            |
| INSR                  | 50             | MARK4                        | 80             | NLK         | 100            |
| INSRR                 | 100            | MAST1                        | 78             | OSR1        | 29             |

| Target                | IGS-2.7        | Target                        | IGS-2.7        | Target                       | IGS-2.7        |
|-----------------------|----------------|-------------------------------|----------------|------------------------------|----------------|
| Gene Symbol           | %Ctrl @ 1000nM | Gene Symbol                   | %Ctrl @ 1000nM | Gene Symbol                  | %Ctrl @ 1000nM |
| p38-alpha             | 100            | PKN2                          | 96             | SBK1                         | 62             |
| p38-beta              | 78             | PKNB(M.tuberculosis)          | 67             | SGK                          | 53             |
| p38-delta             | 95             | PLK1                          | 100            | SgK110                       | 68             |
| p38-gamma             | 75             | PLK2                          | 86             | SGK2                         | 97             |
| PAK1                  | 100            | PLK3                          | 80             | SGK3                         | 90             |
| PAK2                  | 100            | PLK4                          | 71             | SIK                          | 79             |
| PAK3                  | 89             | PRKCD                         | 68             | SIK2                         | 100            |
| PAK4                  | 100            | PRKCE                         | 49             | SLK                          | 82             |
| PAK6                  | 100            | PRKCH                         | 100            | SNARK                        | 82             |
| PAK7                  | 100            | PRKCI                         | 100            | SNRK                         | 99             |
| PCTK1                 | 90             | PRKCQ                         | 100            | SRC                          | 100            |
| PCTK2                 | 91             | PRKD1                         | 100            | SRMS                         | 86             |
| PCTK3                 | 95             | PRKD2                         | 100            | SRPK1                        | 75             |
| PDGFRA                | 100            | PRKD3                         | 100            | SRPK2                        | 100            |
| PDGFRB                | 4              | PRKG1                         | 82             | SRPK3                        | 100            |
| PDPK1                 | 100            | PRKG2                         | 51             | STK16                        | 77             |
| PFCDPK1(P.falciparum) | 82             | PRKR                          | 100            | STK33                        | 100            |
| PFPK5(P.falciparum)   | 100            | PRKX                          | 100            | STK35                        | 100            |
| PFTAIRE2              | 94             | PRP4                          | 99             | STK36                        | 100            |
| PFTK1                 | 94             | PYK2                          | 100            | STK39                        | 100            |
| PHKG1                 | 100            | QSK                           | 76             | SYK                          | 99             |
| PHKG2                 | 100            | RAF1                          | 94             | TAK1                         | 92             |
| PIK3C2B               | 70             | RET                           | 100            | TAOK1                        | 78             |
| PIK3C2G               | 79             | RET(M918T)                    | 100            | TAOK2                        | 100            |
| PIK3CA                | 100            | RET(V804L)                    | 100            | TAOK3                        | 99             |
| PIK3CA(C420R)         | 65             | RET(V804M)                    | 100            | TBK1                         | 79             |
| PIK3CA(E542K)         | 84             | RIOK1                         | 100            | TEC                          | 91             |
| PIK3CA(E545A)         | 68             | RIOK2                         | 97             | TESK1                        | 100            |
| PIK3CA(E545K)         | 71             | RIOK3                         | 100            | TGFBR1                       | 76             |
| PIK3CA(H1047L)        | 95             | RIPK1                         | 82             | TGFBR2                       | 94             |
| PIK3CA(H1047Y)        | 73             | RIPK2                         | 100            | TIE1                         | 100            |
| PIK3CA(I800L)         | 77             | RIPK4                         | 95             | TIE2                         | 91             |
| PIK3CA(M1043I)        | 78             | RIPK5                         | 66             | TLK1                         | 89             |
| PIK3CA(Q546K)         | 100            | ROCK1                         | 64             | TLK2                         | 95             |
| PIK3CB                | 75             | ROCK2                         | 74             | TNIK                         | 100            |
| PIK3CD                | 97             | ROS1                          | 88             | TNK1                         | 79             |
| PIK3CG                | 98             | RPS6KA4(Kin.Dom.1-N-terminal) | 79             | TNK2                         | 78             |
| PIK4CB                | 39             | RPS6KA4(Kin.Dom.2-C-terminal) | 93             | TNNI3K                       | 100            |
| PIM1                  | 100            | RPS6KA5(Kin.Dom.1-N-terminal) | 100            | TRKA                         | 100            |
| PIM2                  | 100            | RPS6KA5(Kin.Dom.2-C-terminal) | 71             | TRKB                         | 100            |
| PIM3                  | 100            | RSK1(Kin.Dom.1-N-terminal)    | 94             | TRKC                         | 96             |
| PIP5K1A               | 87             | RSK1(Kin.Dom.2-C-terminal)    | 100            | TRPM6                        | 96             |
| PIP5K1C               | 78             | RSK2(Kin.Dom.1-N-terminal)    | 90             | TSSK1B                       | 100            |
| PIP5K2B               | 63             | RSK2(Kin.Dom.2-C-terminal)    | 100            | TTK                          | 100            |
| PIP5K2C               | 100            | RSK3(Kin.Dom.1-N-terminal)    | 100            | TXK                          | 100            |
| PKAC-alpha            | 100            | RSK3(Kin.Dom.2-C-terminal)    | 100            | TYK2(JH1domain-catalytic)    | 75             |
| PKAC-beta             | 81             | RSK4(Kin.Dom.1-N-terminal)    | 100            | TYK2(JH2domain-pseudokinase) | 100            |
| PKMYT1                | 96             | RSK4(Kin.Dom.2-C-terminal)    | 100            | TYRO3                        | 66             |
| PKN1                  | 100            | S6K1                          | 92             | ULK1                         | 41             |

| Target      | JGS-2.7         |
|-------------|-----------------|
| Gene Symbol | %Ctrl @ 10000nM |
| ULK2        | 76              |
| ULK3        | 42              |
| VEGFR2      | 100             |
| VRK2        | 72              |
| WEE1        | 87              |
| WEE2        | 100             |
| WNK1        | 70              |
| WNK3        | 87              |
| YANK1       | 46              |
| YANK2       | 100             |
| YANK3       | 100             |
| YES         | 90              |
| YSK1        | 75              |
| YSK4        | 100             |
| ZAK         | 100             |
| ZAP70       | 100             |

%Ctrl Legend

|                |                 |                 |                  |             |
|----------------|-----------------|-----------------|------------------|-------------|
| $0 \leq x < 1$ | $.1 \leq x < 1$ | $1 \leq x < 10$ | $10 \leq x < 35$ | $x \geq 35$ |
|----------------|-----------------|-----------------|------------------|-------------|



**Table S3.-** Kinase profiling for compound **24** (IGS-2.37). Data are expressed in % kinase activity at a concentration of 10  $\mu$ M for the tested compound.

| Target                        | IGS-2.37        | Target              | IGS-2.37        |
|-------------------------------|-----------------|---------------------|-----------------|
| Gene Symbol                   | %Ctrl @ 10000nM | Gene Symbol         | %Ctrl @ 10000nM |
| AAK1                          | 96              | BRK                 | 99              |
| ABL1(E255K)-phosphorylated    | 92              | BRSK1               | 100             |
| ABL1(F317I)-nonphosphorylated | 100             | BRSK2               | 75              |
| ABL1(F317I)-phosphorylated    | 100             | BTK                 | 97              |
| ABL1(F317L)-nonphosphorylated | 100             | BUB1                | 96              |
| ABL1(F317L)-phosphorylated    | 100             | CAMK1               | 100             |
| ABL1(H396P)-nonphosphorylated | 90              | CAMK1D              | 88              |
| ABL1(H396P)-phosphorylated    | 97              | CAMK1G              | 100             |
| ABL1(M351T)-phosphorylated    | 100             | CAMK2A              | 87              |
| ABL1(Q252H)-nonphosphorylated | 100             | CAMK2B              | 96              |
| ABL1(Q252H)-phosphorylated    | 100             | CAMK2D              | 96              |
| ABL1(T315I)-nonphosphorylated | 100             | CAMK2G              | 100             |
| ABL1(T315I)-phosphorylated    | 100             | CAMK4               | 98              |
| ABL1(Y253F)-phosphorylated    | 100             | CAMKK1              | 87              |
| ABL1-nonphosphorylated        | 96              | CAMKK2              | 100             |
| ABL1-phosphorylated           | 88              | CASK                | 100             |
| ABL2                          | 100             | CDC2L1              | 100             |
| ACVR1                         | 98              | CDC2L2              | 91              |
| ACVR1B                        | 87              | CDC2L5              | 100             |
| ACVR2A                        | 100             | CDK11               | 100             |
| ACVR2B                        | 100             | CDK2                | 82              |
| ACVRL1                        | 81              | CDK3                | 94              |
| ADCK3                         | 70              | CDK4-cyclinD1       | 100             |
| ADCK4                         | 71              | CDK4-cyclinD3       | 100             |
| AKT1                          | 100             | CDK5                | 100             |
| AKT2                          | 98              | CDK7                | 26              |
| AKT3                          | 100             | CDK8                | 100             |
| ALK                           | 100             | CDK9                | 77              |
| ALK(C1156Y)                   | 95              | CDKL1               | 100             |
| ALK(L1196M)                   | 100             | CDKL2               | 30              |
| AMPK-alpha1                   | 100             | CDKL3               | 18              |
| AMPK-alpha2                   | 98              | CDKL5               | 100             |
| ANKK1                         | 98              | CHEK1               | 100             |
| ARK5                          | 100             | CHEK2               | 93              |
| ASK1                          | 98              | CIT                 | 89              |
| ASK2                          | 99              | CLK1                | 1.8             |
| AURKA                         | 96              | CLK2                | 4.8             |
| AURKB                         | 98              | CLK3                | 20              |
| AURKC                         | 84              | CLK4                | 2.5             |
| AXL                           | 100             | CSF1R               | 67              |
| BIKE                          | 48              | CSF1R-autoinhibited | 100             |
| BLK                           | 100             | CSK                 | 91              |
| BMPR1A                        | 97              | CSNK1A1             | 42              |
| BMPR1B                        | 100             | CSNK1A1L            | 5.6             |
| BMPR2                         | 90              | CSNK1D              | 2.2             |
| BMX                           | 93              | CSNK1E              | 0.05            |
| BRAF                          | 100             | CSNK1G1             | 87              |
| BRAF(V600E)                   | 100             | CSNK1G2             | 19              |
|                               |                 | CSNK1G3             | 45              |

| Target                    | IGS-2.37        | Target                | IGS-2.37        |
|---------------------------|-----------------|-----------------------|-----------------|
| Gene Symbol               | %Ctrl @ 10000nM | Gene Symbol           | %Ctrl @ 10000nM |
| CSNK2A1                   | 95              | ERK2                  | 97              |
| CSNK2A2                   | 87              | ERK3                  | 48              |
| CTK                       | 80              | ERK4                  | 93              |
| DAPK1                     | 93              | ERK5                  | 83              |
| DAPK2                     | 93              | ERK8                  | 48              |
| DAPK3                     | 95              | ERN1                  | 100             |
| DCAMKL1                   | 74              | FAK                   | 93              |
| DCAMKL2                   | 90              | FER                   | 100             |
| DCAMKL3                   | 90              | FES                   | 96              |
| DDR1                      | 100             | FGFR1                 | 77              |
| DDR2                      | 100             | FGFR2                 | 94              |
| DLK                       | 92              | FGFR3                 | 85              |
| DMPK                      | 100             | FGFR3(G697C)          | 100             |
| DMPK2                     | 95              | FGFR4                 | 95              |
| DRAK1                     | 100             | FGR                   | 94              |
| DRAK2                     | 100             | FLT1                  | 27              |
| DYRK1A                    | 16              | FLT3                  | 71              |
| DYRK1B                    | 3.6             | FLT3(D835H)           | 76              |
| DYRK2                     | 31              | FLT3(D835Y)           | 68              |
| EGFR                      | 94              | FLT3(ITD)             | 84              |
| EGFR(E746-A750del)        | 100             | FLT3(K663Q)           | 72              |
| EGFR(G719C)               | 86              | FLT3(N841I)           | 88              |
| EGFR(G719S)               | 93              | FLT3(R834Q)           | 100             |
| EGFR(L747-E749del, A750P) | 93              | FLT3-autoinhibited    | 100             |
| EGFR(L747-S752del, P753S) | 89              | FLT4                  | 84              |
| EGFR(L747-T751del,Sins)   | 76              | FRK                   | 99              |
| EGFR(L858R)               | 100             | FYN                   | 95              |
| EGFR(L858R,T790M)         | 100             | GAK                   | 100             |
| EGFR(L861Q)               | 100             | GCN2(Kin.Dom.2,S808G) | 100             |
| EGFR(S752-I759del)        | 100             | GRK1                  | 100             |
| EGFR(T790M)               | 100             | GRK4                  | 100             |
| EIF2AK1                   | 100             | GRK7                  | 100             |
| EPHA1                     | 99              | GSK3A                 | 86              |
| EPHA2                     | 94              | GSK3B                 | 79              |
| EPHA3                     | 100             | HASPIN                | 100             |
| EPHA4                     | 98              | HCK                   | 100             |
| EPHA5                     | 90              | HIPK1                 | 90              |
| EPHA6                     | 96              | HIPK2                 | 68              |
| EPHA7                     | 92              | HIPK3                 | 96              |
| EPHA8                     | 94              | HIPK4                 | 38              |
| EPHB1                     | 100             | HPK1                  | 79              |
| EPHB2                     | 95              | HUNK                  | 97              |
| EPHB3                     | 99              | ICK                   | 100             |
| EPHB4                     | 99              | IGF1R                 | 98              |
| EPHB6                     | 100             | IKK-alpha             | 100             |
| ERBB2                     | 100             | IKK-beta              | 100             |
| ERBB3                     | 100             | IKK-epsilon           | 100             |
| ERBB4                     | 89              | INSR                  | 100             |
| ERK1                      | 93              | INSRR                 | 100             |

| Target                       | IGS-2.37        | Target      | IGS-2.37        |
|------------------------------|-----------------|-------------|-----------------|
| Gene Symbol                  | %Ctrl @ 10000nM | Gene Symbol | %Ctrl @ 10000nM |
| IRAK1                        | 100             | MEK1        | 100             |
| IRAK3                        | 65              | MEK2        | 80              |
| IRAK4                        | 100             | MEK3        | 96              |
| ITK                          | 100             | MEK4        | 100             |
| JAK1(JH1domain-catalytic)    | 100             | MEK5        | 100             |
| JAK1(JH2domain-pseudokinase) | 100             | MEK6        | 91              |
| JAK2(JH1domain-catalytic)    | 97              | MELK        | 84              |
| JAK3(JH1domain-catalytic)    | 92              | MERTK       | 100             |
| JNK1                         | 100             | MET         | 69              |
| JNK2                         | 90              | MET(M1250T) | 58              |
| JNK3                         | 99              | MET(Y1235D) | 99              |
| KIT                          | 40              | MINK        | 98              |
| KIT(A829P)                   | 100             | MKK7        | 96              |
| KIT(D816H)                   | 97              | MKNK1       | 99              |
| KIT(D816V)                   | 100             | MKNK2       | 92              |
| KIT(L576P)                   | 44              | MLCK        | 5.4             |
| KIT(V559D)                   | 30              | MLK1        | 97              |
| KIT(V559D,T670I)             | 37              | MLK2        | 84              |
| KIT(V559D,V654A)             | 75              | MLK3        | 99              |
| KIT-autoinhibited            | 100             | MRCKA       | 94              |
| LATS1                        | 92              | MRCKB       | 100             |
| LATS2                        | 100             | MST1        | 100             |
| LCK                          | 100             | MST1R       | 62              |
| LIMK1                        | 100             | MST2        | 89              |
| LIMK2                        | 100             | MST3        | 100             |
| LKB1                         | 84              | MST4        | 100             |
| LOK                          | 99              | MTOR        | 92              |
| LRRK2                        | 93              | MUSK        | 69              |
| LRRK2(G2019S)                | 98              | MYLK        | 100             |
| LTK                          | 100             | MYLK2       | 61              |
| LYN                          | 100             | MYLK4       | 64              |
| LZK                          | 95              | MYO3A       | 99              |
| MAK                          | 46              | MYO3B       | 91              |
| MAP3K1                       | 92              | NDR1        | 100             |
| MAP3K15                      | 69              | NDR2        | 88              |
| MAP3K2                       | 100             | NEK1        | 100             |
| MAP3K3                       | 98              | NEK10       | 94              |
| MAP3K4                       | 86              | NEK11       | 100             |
| MAP4K2                       | 100             | NEK2        | 100             |
| MAP4K3                       | 91              | NEK3        | 92              |
| MAP4K4                       | 100             | NEK4        | 100             |
| MAP4K5                       | 96              | NEK5        | 100             |
| MAPKAPK2                     | 90              | NEK6        | 95              |
| MAPKAPK5                     | 100             | NEK7        | 100             |
| MARK1                        | 88              | NEK9        | 99              |
| MARK2                        | 100             | NIK         | 99              |
| MARK3                        | 100             | NIM1        | 100             |
| MARK4                        | 82              | NLK         | 89              |
| MAST1                        | 100             | OSR1        | 100             |

| Target                | IGS-2.37        | Target                        | IGS-2.37        |
|-----------------------|-----------------|-------------------------------|-----------------|
| Gene Symbol           | %Ctrl @ 10000nM | Gene Symbol                   | %Ctrl @ 10000nM |
| p38-alpha             | 97              | PKN2                          | 98              |
| p38-beta              | 92              | PKNB(M.tuberculosis)          | 100             |
| p38-delta             | 72              | PLK1                          | 94              |
| p38-gamma             | 85              | PLK2                          | 68              |
| PAK1                  | 93              | PLK3                          | 85              |
| PAK2                  | 97              | PLK4                          | 92              |
| PAK3                  | 100             | PRKCD                         | 85              |
| PAK4                  | 100             | PRKCE                         | 84              |
| PAK6                  | 100             | PRKCH                         | 100             |
| PAK7                  | 89              | PRKCI                         | 97              |
| PCTK1                 | 100             | PRKCQ                         | 91              |
| PCTK2                 | 92              | PRKD1                         | 99              |
| PCTK3                 | 72              | PRKD2                         | 100             |
| PDGFRA                | 100             | PRKD3                         | 100             |
| PDGFRB                | 17              | PRKG1                         | 100             |
| PDPK1                 | 77              | PRKG2                         | 100             |
| PFCDPK1(P.falciparum) | 100             | PRKR                          | 87              |
| PFPK5(P.falciparum)   | 100             | PRKX                          | 100             |
| PFTAIRE2              | 39              | PRP4                          | 94              |
| PFTK1                 | 66              | PYK2                          | 99              |
| PHKG1                 | 100             | QSK                           | 100             |
| PHKG2                 | 95              | RAF1                          | 95              |
| PIK3C2B               | 84              | RET                           | 100             |
| PIK3C2G               | 100             | RET(M918T)                    | 99              |
| PIK3CA                | 86              | RET(V804L)                    | 100             |
| PIK3CA(C420R)         | 100             | RET(V804M)                    | 98              |
| PIK3CA(E542K)         | 100             | RIOK1                         | 68              |
| PIK3CA(E545A)         | 97              | RIOK2                         | 89              |
| PIK3CA(E545K)         | 97              | RIOK3                         | 90              |
| PIK3CA(H1047L)        | 100             | RIPK1                         | 60              |
| PIK3CA(H1047Y)        | 81              | RIPK2                         | 85              |
| PIK3CA(I800L)         | 80              | RIPK4                         | 100             |
| PIK3CA(M1043I)        | 100             | RIPK5                         | 100             |
| PIK3CA(Q546K)         | 100             | ROCK1                         | 100             |
| PIK3CB                | 100             | ROCK2                         | 100             |
| PIK3CD                | 100             | ROS1                          | 100             |
| PIK3CG                | 86              | RPS6KA4(Kin.Dom.1-N-terminal) | 91              |
| PIK4CB                | 97              | RPS6KA4(Kin.Dom.2-C-terminal) | 94              |
| PIM1                  | 99              | RPS6KA5(Kin.Dom.1-N-terminal) | 92              |
| PIM2                  | 90              | RPS6KA5(Kin.Dom.2-C-terminal) | 100             |
| PIM3                  | 100             | RSK1(Kin.Dom.1-N-terminal)    | 92              |
| PIP5K1A               | 74              | RSK1(Kin.Dom.2-C-terminal)    | 98              |
| PIP5K1C               | 100             | RSK2(Kin.Dom.1-N-terminal)    | 100             |
| PIP5K2B               | 100             | RSK2(Kin.Dom.2-C-terminal)    | 82              |
| PIP5K2C               | 100             | RSK3(Kin.Dom.1-N-terminal)    | 99              |
| PKAC-alpha            | 80              | RSK3(Kin.Dom.2-C-terminal)    | 89              |
| PKAC-beta             | 94              | RSK4(Kin.Dom.1-N-terminal)    | 91              |
| PKMYT1                | 100             | RSK4(Kin.Dom.2-C-terminal)    | 93              |
| PKN1                  | 75              | S6K1                          | 100             |

| Target                       | IGS-2.37        |
|------------------------------|-----------------|
| Gene Symbol                  | %Ctrl @ 10000nM |
| SBK1                         | 100             |
| SGK                          | 89              |
| SgK110                       | 94              |
| SGK2                         | 99              |
| SGK3                         | 100             |
| SIK                          | 100             |
| SIK2                         | 100             |
| SLK                          | 93              |
| SNARK                        | 98              |
| SNRK                         | 100             |
| SRC                          | 90              |
| SRMS                         | 100             |
| SRPK1                        | 99              |
| SRPK2                        | 100             |
| SRPK3                        | 94              |
| STK16                        | 54              |
| STK33                        | 67              |
| STK35                        | 78              |
| STK36                        | 85              |
| STK39                        | 100             |
| SYK                          | 100             |
| TAK1                         | 88              |
| TAOK1                        | 100             |
| TAOK2                        | 95              |
| TAOK3                        | 99              |
| TBK1                         | 98              |
| TEC                          | 100             |
| TESK1                        | 100             |
| TGFBR1                       | 97              |
| TGFBR2                       | 94              |
| TIE1                         | 96              |
| TIE2                         | 86              |
| TLK1                         | 99              |
| TLK2                         | 100             |
| TNIK                         | 93              |
| TNK1                         | 89              |
| TNK2                         | 100             |
| TNNI3K                       | 100             |
| TRKA                         | 100             |
| TRKB                         | 100             |
| TRKC                         | 100             |
| TRPM6                        | 84              |
| TSSK1B                       | 81              |
| TTK                          | 83              |
| TXK                          | 83              |
| TYK2(JH1domain-catalytic)    | 80              |
| TYK2(JH2domain-pseudokinase) | 100             |
| TYRO3                        | 100             |
| ULK1                         | 97              |

| Target      | IGS-2.37        |
|-------------|-----------------|
| Gene Symbol | %Ctrl @ 10000nM |
| ULK2        | 80              |
| ULK3        | 89              |
| VEGFR2      | 95              |
| VRK2        | 100             |
| WEE1        | 99              |
| WEE2        | 100             |
| WNK1        | 100             |
| WNK3        | 100             |
| YANK1       | 100             |
| YANK2       | 84              |
| YANK3       | 100             |
| YES         | 100             |
| YSK1        | 97              |
| YSK4        | 100             |
| ZAK         | 100             |
| ZAP70       | 100             |

%Ctrl Legend

|        |        |        |         |      |
|--------|--------|--------|---------|------|
| 0≤x<.1 | .1≤x<1 | 1≤x<10 | 10≤x<35 | x≥35 |
|--------|--------|--------|---------|------|

**Figura S1.-** Docking studies with CK-1 $\delta$  (PDB Code: 3UYS) of compound **24** (A) and **34** (B)

A)

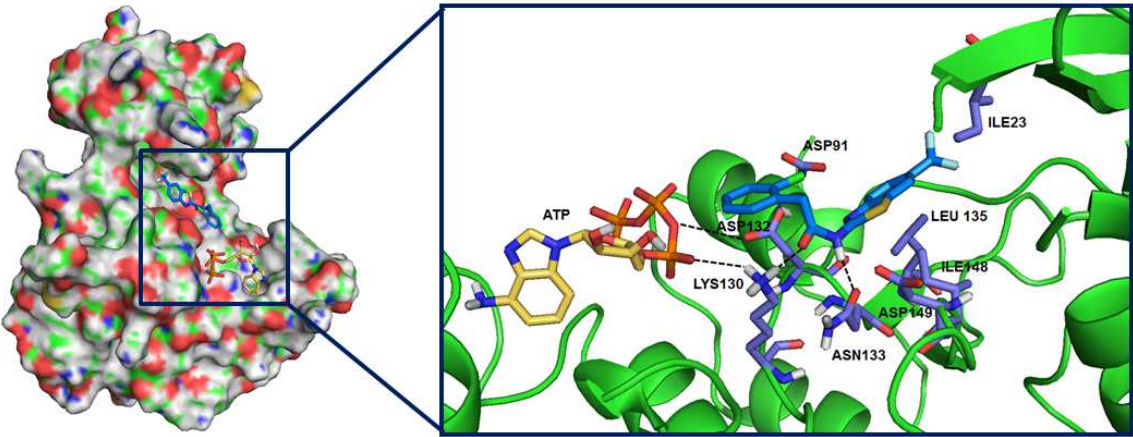

B)

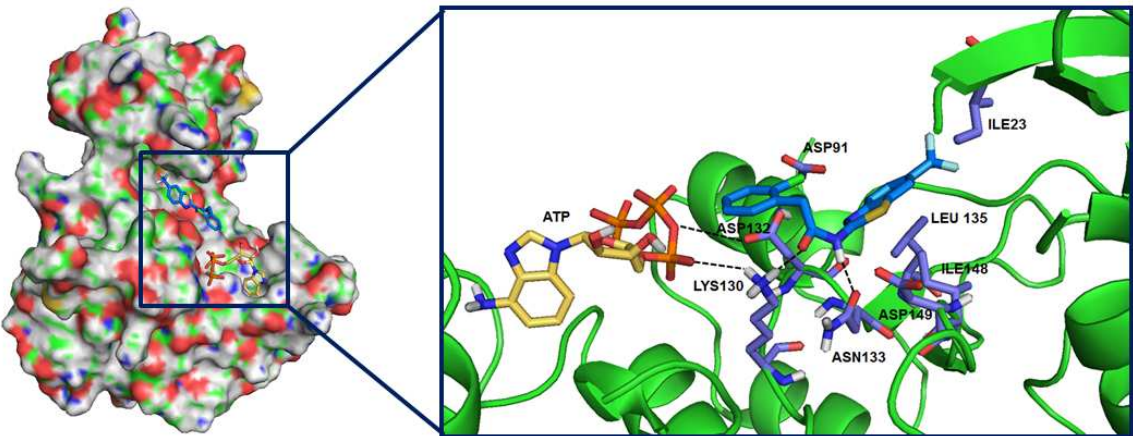

**Figure S2.-** Linear correlation between experimental and reported permeability of commercial drugs using the PAMPA-BBB assay.

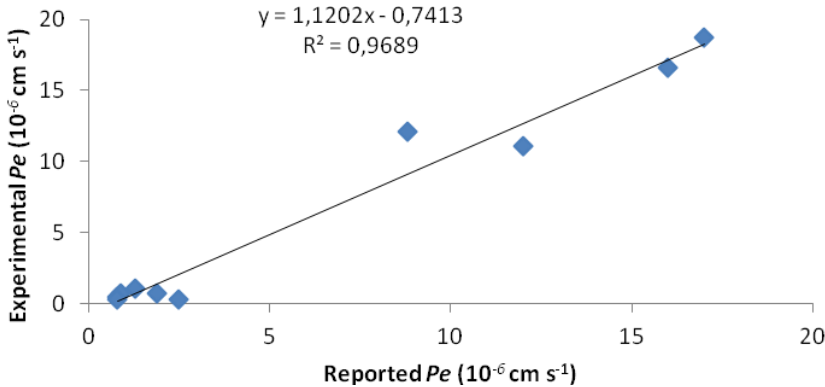

Supplement: jm500065f_si_002.pdf [file jm500065f_si_002.pdf]
